# Supplementary material for: RON and MET Co-overexpression Are Significant Pathological Characteristics of Poor Survival and Therapeutic Targets of Tyrosine Kinase Inhibitors in Triple-Negative Breast Cancer
Source: PubMed Central journal article supplement — Cancer Res Treat. 2020 Apr 22;52(3):973–86. doi: 10.4143/crt.2019.726 (PMC7373856; doi:10.4143/crt.2019.726), 2020-04-22
Supplement: crt-2019-726-suppl2.pdf [file crt-2019-726-suppl2.pdf]

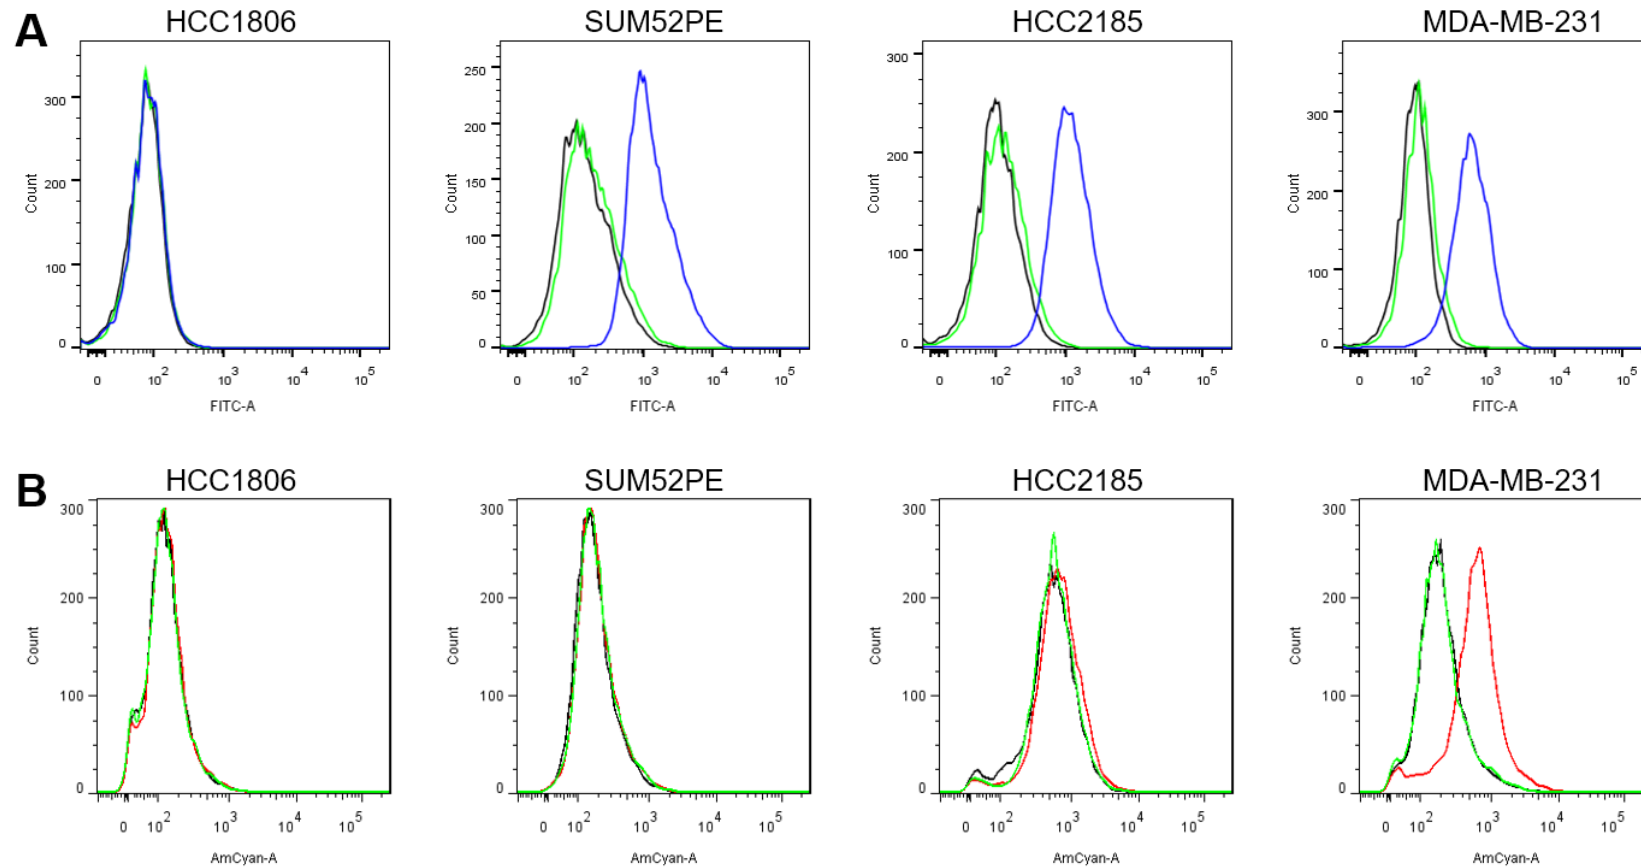

**S2 Fig.** RON and MET expression in triple-negative breast cancer (TNBC) cells. (A) Triple-negative breast cancer cells ( $1 \times 10^6$  cells/mL) in 1 mL phosphate buffered saline (PBS) were incubated with 5.0  $\mu$ g Zt/g4 (blue line) for 60 minutes. Isotope-matched mouse IgG (green line) and blank (black line) without antibody were used as the control. (B) TNBC cells ( $1 \times 10^6$  cells/mL) in 1 mL PBS were incubated in duplicate with BV510 mouse anti-human MET (red line) for 30 minutes. BV510 mouse IgG (green line) and blank (black line) without antibody were used as the control.
